# Supplementary material for: How well can the exponential-growth coalescent approximate constant-rate birth–death population dynamics?
Source: PubMed Central journal article supplement (PMC4426635; doi:10.1098/rspb.2015.0420), 2015-05-07
Supplement: rspb20150420supp1.pdf [file rspb20150420supp1.pdf]

How well can the exponential-growth coalescent  
approximate constant rate birth-death population  
dynamics?

*Supplementary Material*

Tanja Stadler<sup>1,2,\*</sup>, Timothy G. Vaughan<sup>3,4,5</sup>,  
Alex Gavruskin<sup>3,†</sup>, Stephane Guindon<sup>7,8,†</sup>,  
Denise Kühnert<sup>1,2,6,†</sup>, Gabriel E. Leventhal<sup>6,†</sup>,  
Alexei J. Drummond<sup>3,4,\*</sup>

<sup>1</sup> Department of Biosystems Science and Engineering, ETH Zürich, Switzerland

<sup>2</sup> Swiss Institute of Bioinformatics (SIB), Switzerland

<sup>3</sup> Department of Computer Science, The University of Auckland, Auckland, New Zealand

<sup>4</sup> Allan Wilson Centre for Molecular Ecology and Evolution, New Zealand

<sup>5</sup> Massey University, Palmerston North, New Zealand

<sup>6</sup> Institute of Integrative Biology, ETH Zürich, Zürich, Switzerland

<sup>7</sup> Department of Statistics, The University of Auckland, Auckland, New Zealand

<sup>8</sup> LIRMM, CNRS Montpellier, France

† Alphabetical order

\* Corresponding authors: [tanja.stadler@bsse.ethz.ch](mailto:tanja.stadler@bsse.ethz.ch) & [alexei@cs.auckland.ac.nz](mailto:alexei@cs.auckland.ac.nz)

# Supplementary Methods

## Derivation of $f_{BD}(\tau)$

In the following, we derive an analytical expression for  $f_{BD}(\tau)$ . We employ point process theory (Popovic, 2004; Gernhard, 2008). The population dynamic process of birth and death events until time  $T$  can be represented by an oriented tree (Ford et al., 2009). An oriented tree on  $n$  tips at time  $T$ , and all dead lineages being pruned, may be represented by a vector of  $n - 1$  coalescent events. Now, selecting two tips at random from the  $n$  tips and tracing back until their time of coalescence corresponds to choosing any block of successive entries from the vector of  $n - 1$  coalescent events uniformly at random, and the time of coalescence is the maximum of the coalescent events in the chosen block (Lambert and Stadler, 2013). The first order statistic of  $i - 1$  coalescent events is given by (Gernhard, 2008, Eq. 6) as

$$(i - 1)F(\tau|T)^{i-2}f(\tau|T),$$

where  $f(\tau|T) = \mu p_1(\tau)/p_0(T)$  and  $F(\tau|T) = p_0(\tau)/p_0(T)$ . There are  $\binom{n}{2}$  possible block choices in a vector of  $n - 1$  entries. For block size  $i - 1$ , there are  $n - (i - 1)$  possible ways to choose two lineages. Furthermore, the probability of obtaining  $n$  extant lineages after time  $\tau$  is (Kendall, 1948),

$$p_n(\tau) = p_1(\tau) \left( \frac{\lambda}{\mu} p_0(\tau) \right)^{n-1}.$$

Conditioning on obtaining at least two lineages after time  $\tau$  requires dividing  $p_n(\tau)$  by  $1 - p_0(\tau) - p_1(\tau)$ . Summing over all  $n$  and  $i$  yields

$$f_{BD}(\tau) = \sum_{n=2}^{\infty} \sum_{i=2}^n (i - 1)F(\tau|T)^{i-2}f(\tau|T) \frac{n - (i - 1)}{\binom{n}{2}} \frac{p_1(T)}{1 - p_0(T) - p_1(T)} \left( \frac{\lambda}{\mu} p_0(T) \right)^{n-1}.$$

With  $\xi = \frac{\lambda}{\mu} p_0(T) = \frac{\lambda - \lambda e^{-(\lambda - \mu)t}}{\lambda - \mu e^{-(\lambda - \mu)t}}$  and noting that  $|\xi| < 1$  and  $|\xi F(\tau|T)| = |\frac{\lambda}{\mu} p_0(\tau)| < 1$ , we obtain for  $f_{BD}(\tau)$ ,

$$\begin{aligned}
f_{BD}(\tau) &= \sum_{n=2}^{\infty} \sum_{i=2}^n (i-1) F(\tau|T)^{i-2} f(\tau|T)^{\frac{n-(i-1)}{\binom{n}{2}}} \frac{p_1(T)}{1-p_0(T)-p_1(T)} \left(\frac{\lambda}{\mu} p_0(T)\right)^{n-1} \\
&= \frac{f(\tau|T)p_1(T)}{F(\tau|T)(1-p_0(T)-p_1(T))} \sum_{n=2}^{\infty} \frac{1}{\binom{n}{2}} \left(\frac{\lambda}{\mu} p_0(T)\right)^{n-1} \sum_{i=1}^{n-1} i F(\tau|T)^i (n-i) \\
&= \frac{f(\tau|T)p_1(T)}{F(\tau|T)(1-p_0(T)-p_1(T))} \sum_{n=2}^{\infty} \frac{1}{\binom{n}{2}} \left(\frac{\lambda}{\mu} p_0(T)\right)^{n-1} \\
&\quad \times \left( n \frac{(n-1)F(\tau|T)^{n+1} - nF(\tau|T)^n + F(\tau|T)}{(F(\tau|T)-1)^2} \right. \\
&\quad \quad \left. - \frac{1}{(F(\tau|T)-1)^3} \left[ (n-1)^2 F(\tau|T)^{n+2} - (2n^2 - 2n - 1) F(\tau|T)^{n+1} \right. \right. \\
&\quad \quad \quad \left. \left. + n^2 F(\tau|T)^n - F(\tau|T)^2 - F(\tau|T) \right] \right) \\
&= \frac{2f(\tau|T)p_1(T)}{(1-p_0(T)-p_1(T))(F(\tau|T)-1)^3} \\
&\quad \times \sum_{n=2}^{\infty} \left\{ \frac{1}{n(n-1)} \left(\frac{\lambda}{\mu} p_0(T)\right)^{n-1} (nF(\tau|T)^{n+1} - nF(\tau|T)^n + nF(\tau|T) \right. \\
&\quad \quad \left. - n - F(\tau|T)^{n+1} - F(\tau|T)^n + F(\tau|T) + 1) \right\} \\
&= \frac{2f(\tau|T)p_1(T)}{(1-p_0(T)-p_1(T))(F(\tau|T)-1)^3} \\
&\quad \times \left[ (F(\tau|T)+1) \frac{1-\xi}{\xi} (\ln(1-\xi) - 1) \right. \\
&\quad \quad \left. - F(\tau|T)(F(\tau|T)+1) \frac{1-\xi F(\tau|T)}{\xi F(\tau|T)} (\ln(1-\xi F(\tau|T)) - 1) \right. \\
&\quad \quad \left. - (F(\tau|T)-1) \ln(1-\xi) - F(\tau|T)(F(\tau|T)-1) \ln(1-\xi F(\tau|T)) \right] \\
&= \frac{2f(\tau|T)p_1(T)}{(1-p_0(T)-p_1(T))(1-F(\tau|T))^3 \xi} \\
&\quad \times \left[ (F(\tau|T)^2 - 1) \xi + F(\tau|T)(2\xi - 1) (\ln(1-\xi) - \ln(1-\xi F(\tau|T))) \right. \\
&\quad \quad \left. + \ln(1-\xi F(\tau|T)) - \ln(1-\xi) \right] \\
&= \frac{2f(\tau|T)p_1(T)}{(1-p_0(T)-p_1(T))(1-F(\tau|T))^3} \\
&\quad \times \left( F(\tau|T)^2 - 1 + \left( 2F(\tau|T) - \frac{\mu F(\tau|T) + \mu}{\lambda p_0} \right) \ln \frac{\mu - \lambda p_0}{\mu - \lambda p_0 F(\tau|T)} \right) \\
&= \frac{2f(\tau|T)p_1(T)}{(1-p_0(T)-p_1(T))(1-F(\tau|T))^3} \\
&\quad \times \left( F(\tau|T)^2 - 1 + \left( 2F(\tau|T) - \frac{\mu F(\tau|T) + 1}{\lambda p_0(T)} \right) \ln \left( \frac{\mu - \lambda p_0(T)}{\mu - \lambda p_0(\tau)} \right) \right).
\end{aligned}$$

We note that here we condition on sampling exactly two out of  $n$  tips. In previous work (Yang and Rannala, 1997; Stadler, 2010, 2013), it was assumed that each tip is sampled with a probability  $\rho$ . Thus the probability of sampling exactly two tips is  $\binom{n}{2}\rho^2(1-\rho)^{n-2}$ . The probability density of sampling two tips with coalescent time  $\tau$ , now without conditioning on the process leading to at least two extant lineages, is thus

$$f_{BD}(\tau|\rho) = (1 - p_0(T) - p_1(T)) \sum_{n=2}^{\infty} \sum_{i=2}^n \binom{n}{2} \rho^2 (1 - \rho)^{n-2} (i - 1) \\ \times F(\tau|T)^{i-2} f(\tau|T) \frac{n - (i - 1)}{\binom{n}{2}} \frac{p_1(T)}{1 - p_0(T) - p_1(T)} \left( \frac{\lambda}{\mu} p_0(T) \right)^{n-1}.$$

This expression for  $f_{BD}(\tau|\rho)$  simplifies to Equation (1) in (Stadler, 2013).

## Link between the *BD* and *CD* model

Under the coalescent model, when time is expressed in calendar units, the coalescent rate at time  $\tau$  is  $1/(N(\tau)\rho)$ , with  $N(\tau)$  being the population size at time  $\tau$ . This means that the rate is defined not only by the population size  $N(\tau)$ , but also by a time-scale  $\rho$ , which, for a Wright-Fisher model, simply corresponds to the generation time.

On the other hand, under the birth-death process, the rate with which a single individual undergoes a birth event is  $\lambda$ . In a population with  $N(\tau)$  individuals where each individual independently undergoes birth events at a rate  $\lambda$ , the total rate at which a birth event occurs is  $\lambda N(\tau)$ . The probability that a single forward-time birth event corresponds to the backward-time coalescence of two sampled lineages is  $1/\binom{N(\tau)}{2}$ . Thus the rate of coalescence of two lineages under the birth-death process is  $\lambda N(\tau) / \binom{N(\tau)}{2} = 2\lambda / (N(\tau) - 1)$ . When  $N(\tau)$  is large,  $N(\tau) - 1 \simeq N(\tau)$  and the rate of coalescence of the two lineages simplifies to  $2\lambda / N(\tau)$ .

We thus have two independent derivations of the coalescent rate at time  $\tau$ , one under the coalescent and one under the birth-death model. For the coalescent to approximate the birth-death process, the following equality must hold,

$$\frac{1}{N(\tau)\rho} = \frac{2\lambda}{N(\tau)},$$

and hence  $\rho = 1/(2\lambda)$ . In the particular case where  $\lambda = \mu$ ,  $\rho$  can be interpreted as the expected length of a branch in the genealogy of a population evolving under a birth-death process.

## Derivation of $f_{CDN}(\tau)$

Given a population size  $N_{BD}(t)$  from Equation (2) in main text, the modified coalescent rate measured in backward time,  $\tau = T - t$ , is

$$\frac{2\lambda}{N_{BD}(\tau)} = \frac{2\lambda r}{(\lambda - \mu e^{-rT} - \frac{\mu^2}{\lambda - \mu e^{-rT}} e^{-2rT}) e^{rT} e^{-r\tau} + \frac{\mu(\lambda + \mu)}{\lambda - \mu e^{-rT}} e^{-rT} - \frac{\lambda\mu}{\lambda - \mu e^{-rT}} e^{-rT} e^{r\tau}}. \quad (1)$$

Thus, the coalescent time probability density under the coalescent with population size function  $N_{BD}(\tau)$  is,

$$f_{CDN}(\tau) = \frac{2\lambda}{N_{BD}(\tau)} e^{-\int_0^\tau \frac{2\lambda}{N_{BD}(u)} du}.$$

To derive the explicit form of  $f_{CDN}(\tau)$ , let us denote the coefficients

$$\begin{aligned} c_0 &= (\lambda - \mu e^{-rT} - \frac{\mu^2}{\lambda - \mu e^{-rT}} e^{-2rT}) e^{rT}, \\ c_1 &= \frac{\mu(\lambda + \mu)}{\lambda - \mu e^{-rT}} e^{-rT}, \\ c_2 &= -\frac{\lambda\mu}{\lambda - \mu e^{-rT}} e^{-rT}. \end{aligned}$$

The coalescent rate  $2\lambda/N_{BD}(\tau)$  from Equation (1) becomes  $2\lambda r/(c_2 e^{r\tau} + c_1 + c_0 e^{-r\tau})$ . Further, let

$$g(\tau) := \int_0^\tau \frac{2\lambda}{N_{BD}(\tau)} d\tau = 2\lambda \int_0^\tau \frac{r e^{r\tau} d\tau}{c_2 (e^{r\tau})^2 + c_1 e^{r\tau} + c_0} = 2\lambda \int_0^\tau \frac{1}{c_2 (e^{r\tau})^2 + c_1 e^{r\tau} + c_0} de^{r\tau}.$$

The result of integration is,

$$g(\tau) = \begin{cases} \frac{2\lambda}{\sqrt{c_1^2 - 4c_2c_0}} \ln \left| \frac{(2c_2 e^{r\tau} + c_1 - \sqrt{c_1^2 - 4c_2c_0})(2c_2 + c_1 + \sqrt{c_1^2 - 4c_2c_0})}{(2c_2 e^{r\tau} + c_1 + \sqrt{c_1^2 - 4c_2c_0})(2c_2 + c_1 - \sqrt{c_1^2 - 4c_2c_0})} \right| & \text{if } 4c_2c_0 - c_1^2 < 0, \\ \frac{4\lambda}{2c_2 + c_1} - \frac{4\lambda}{2c_2 e^{r\tau} + c_1} & \text{if } 4c_2c_0 - c_1^2 = 0, \\ \frac{4\lambda}{\sqrt{4c_2c_0 - c_1^2}} \left( \arctan \frac{2c_2 e^{r\tau} + c_1}{\sqrt{4c_2c_0 - c_1^2}} - \arctan \frac{2c_2 + c_1}{\sqrt{4c_2c_0 - c_1^2}} \right) & \text{if } 4c_2c_0 - c_1^2 > 0, \end{cases}$$

which establishes

$$f_{CDN}(\tau) = \frac{2\lambda}{N_{BD}(\tau)} e^{-g(\tau)}.$$

## References

- Daniel Ford, Frederick A Matsen, and Tanja Stadler. A method for investigating relative timing information on phylogenetic trees. *Syst Biol*, 58(2):167–83, Apr 2009. doi: 10.1093/sysbio/syp018.
- Tanja Gernhard. The conditioned reconstructed process. *J Theor Biol*, 253(4):769–78, Aug 2008. doi: 10.1016/j.jtbi.2008.04.005.
- David G. Kendall. On the generalized “birth-and-death” process. *Ann Math Stat*, 19(1): 1–15, Mar 1948.
- Amaury Lambert and Tanja Stadler. Birth-death models and coalescent point processes: the shape and probability of reconstructed phylogenies. *Theor Popul Biol*, 90:113–28, Dec 2013. doi: 10.1016/j.tpb.2013.10.002.
- Lea Popovic. Asymptotic genealogy of a critical branching process. *Ann Appl Probab*, 14(4):2120–2148, 2004. doi: 10.1214/105051604000000486.

Tanja Stadler. Sampling-through-time in birth-death trees. *J Theor Biol*, 267(3):396–404, Dec 2010. doi: 10.1016/j.jtbi.2010.09.010.

Tanja Stadler. How can we improve accuracy of macroevolutionary rate estimates? *Syst Biol*, 62(2):321–329, 2013. doi: 10.1093/sysbio/sys073.

Ziheng Yang and Bruce Rannala. Bayesian phylogenetic inference using DNA sequences: a markov chain monte carlo method. *Mol Biol Evol*, 14(7):717–724, 1997.

## Supplementary Figures

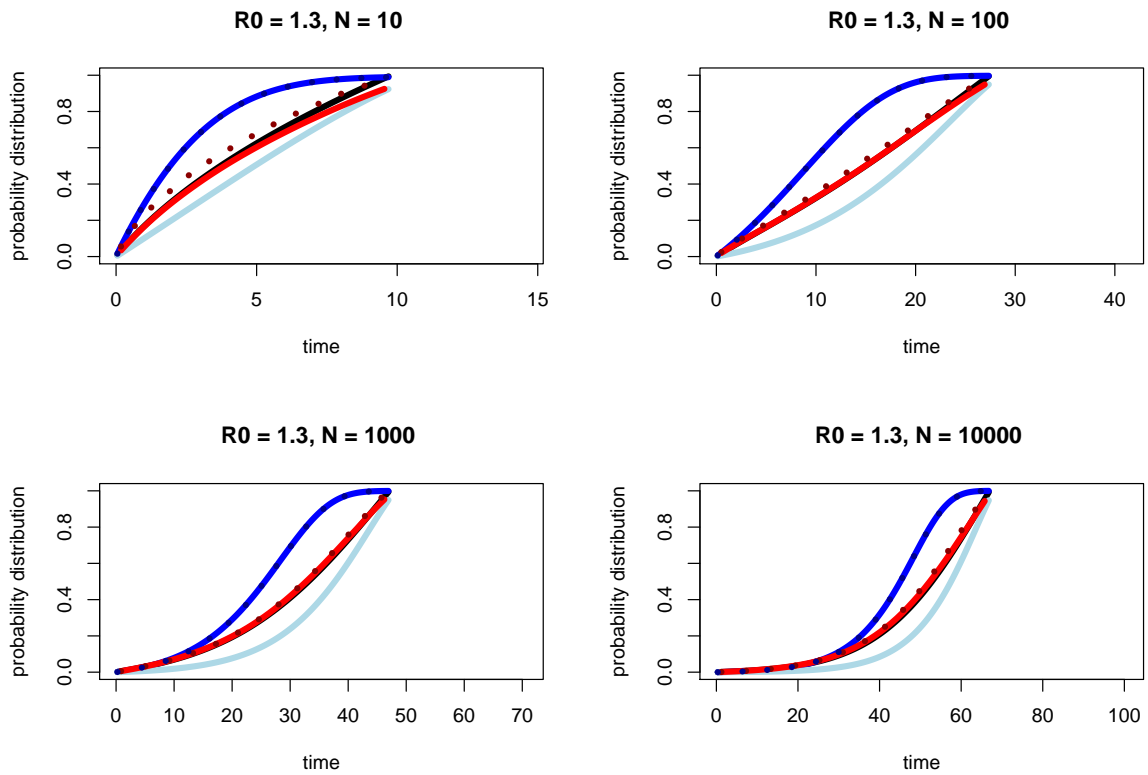

Supp. Fig. 1: Cumulative probability distribution function of time to coalescence for  $R_0 = 1.3$  and  $N = 10, 100, 1000, 10000$ . For details see caption of Figure 2.

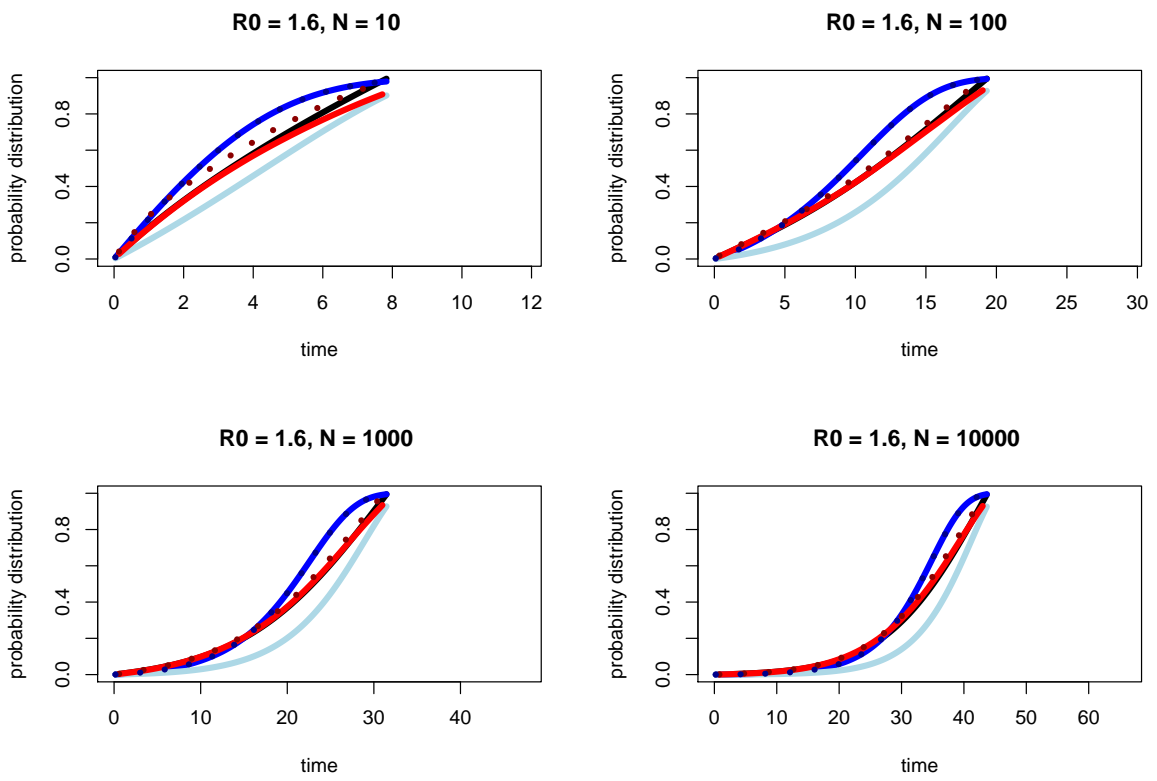

Supp. Fig. 2: Cumulative probability distribution function of time to coalescence for  $R_0 = 1.6$  and  $N = 10, 100, 1000, 10000$ . For details see caption of Figure 2.



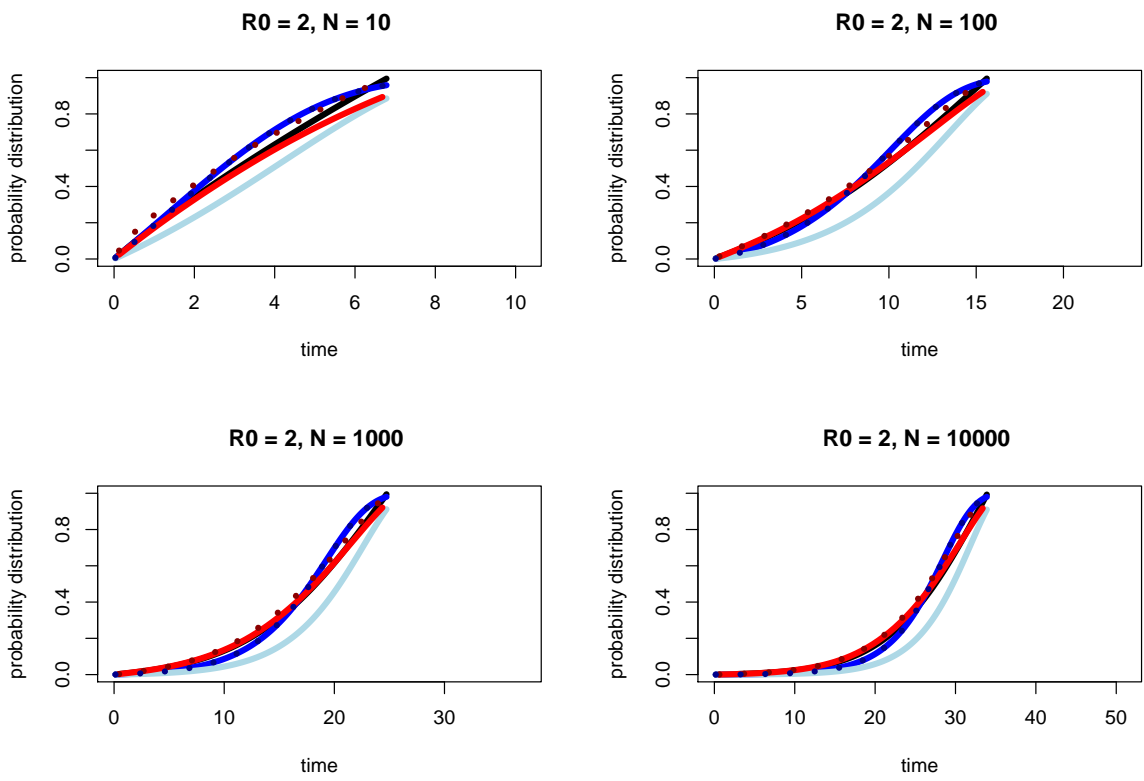

Supp. Fig. 3: Cumulative probability distribution function of time to coalescence for  $R_0 = 2.0$  and  $N = 10, 100, 1000, 10000$ . For details see caption of Figure 2.

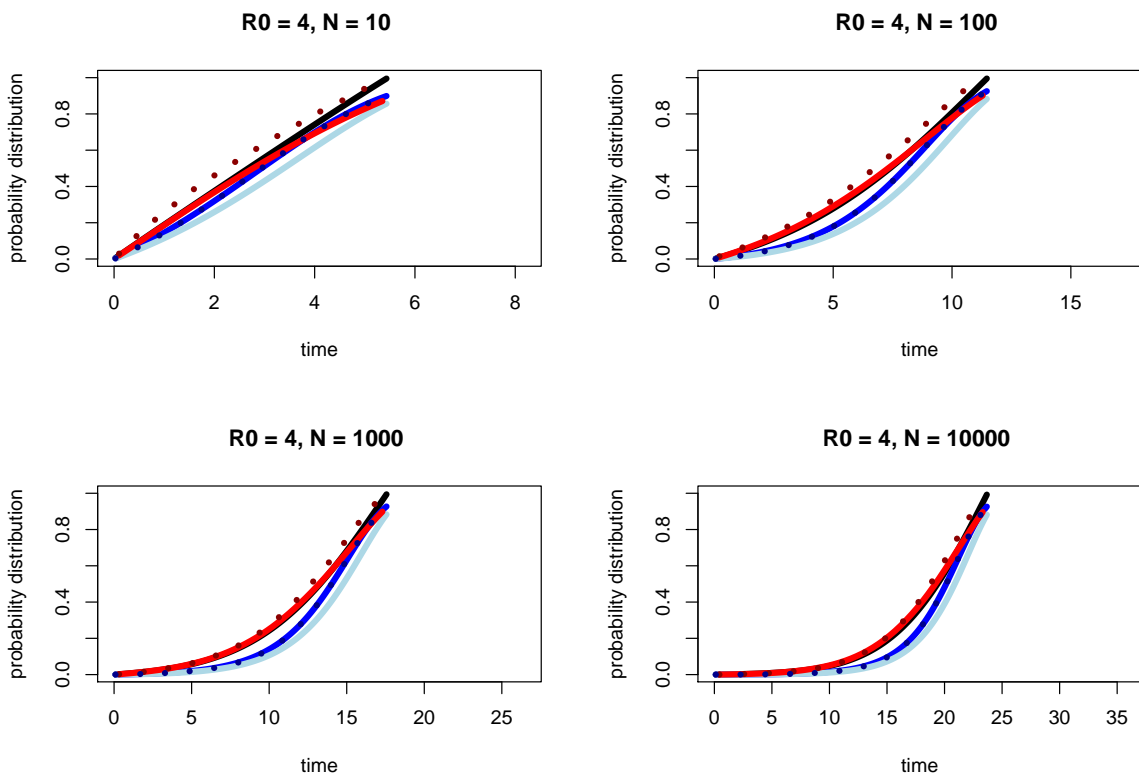

Supp. Fig. 4: Cumulative probability distribution function of time to coalescence for  $R_0 = 1.3$  and  $N = 10, 100, 1000, 10000$ . For details see caption of Figure 2.

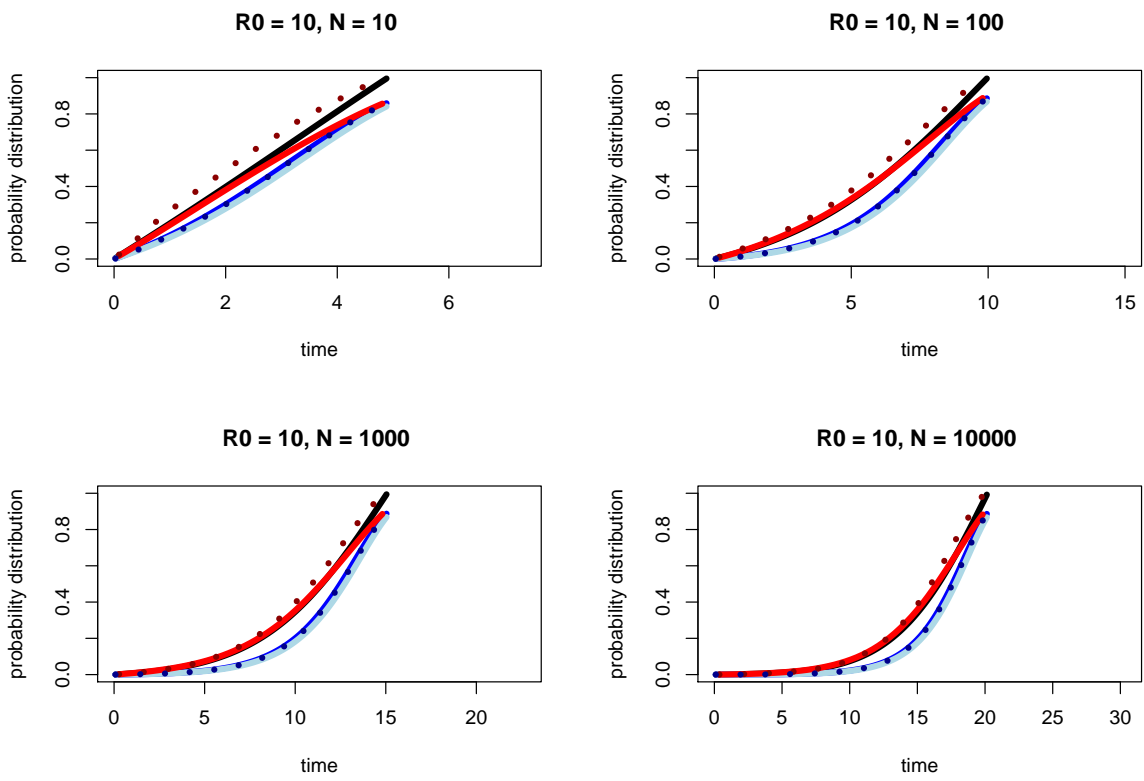

Supp. Fig. 5: Cumulative probability distribution function of time to coalescence for  $R_0 = 10$  and  $N = 10, 100, 1000, 10000$ . For details see caption of Figure 2.
